# Supplementary material for: Uridine inhibits the stemness of intestinal stem cells in 3D intestinal organoids and mice
Source: PubMed Central journal article supplement — RSC Adv. 2020 Feb 11;10(11):6377–87. doi: 10.1039/c9ra07742a (PMC9049648; doi:10.1039/c9ra07742a), 2020-02-11
Supplement: RA-010-C9RA07742A-s001.pdf [file RA-010-C9RA07742A-s001.pdf]

Supplementary material:

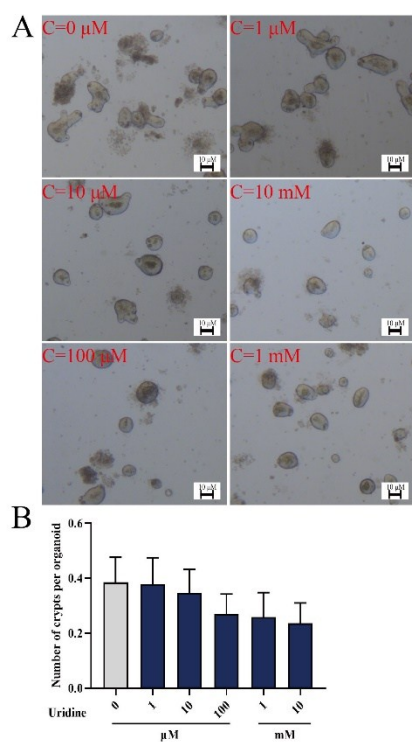

**Supplementary FIGURE 1** Uridine treatment (18h) decreases the number of crypts per intestinal organoid (n=50).

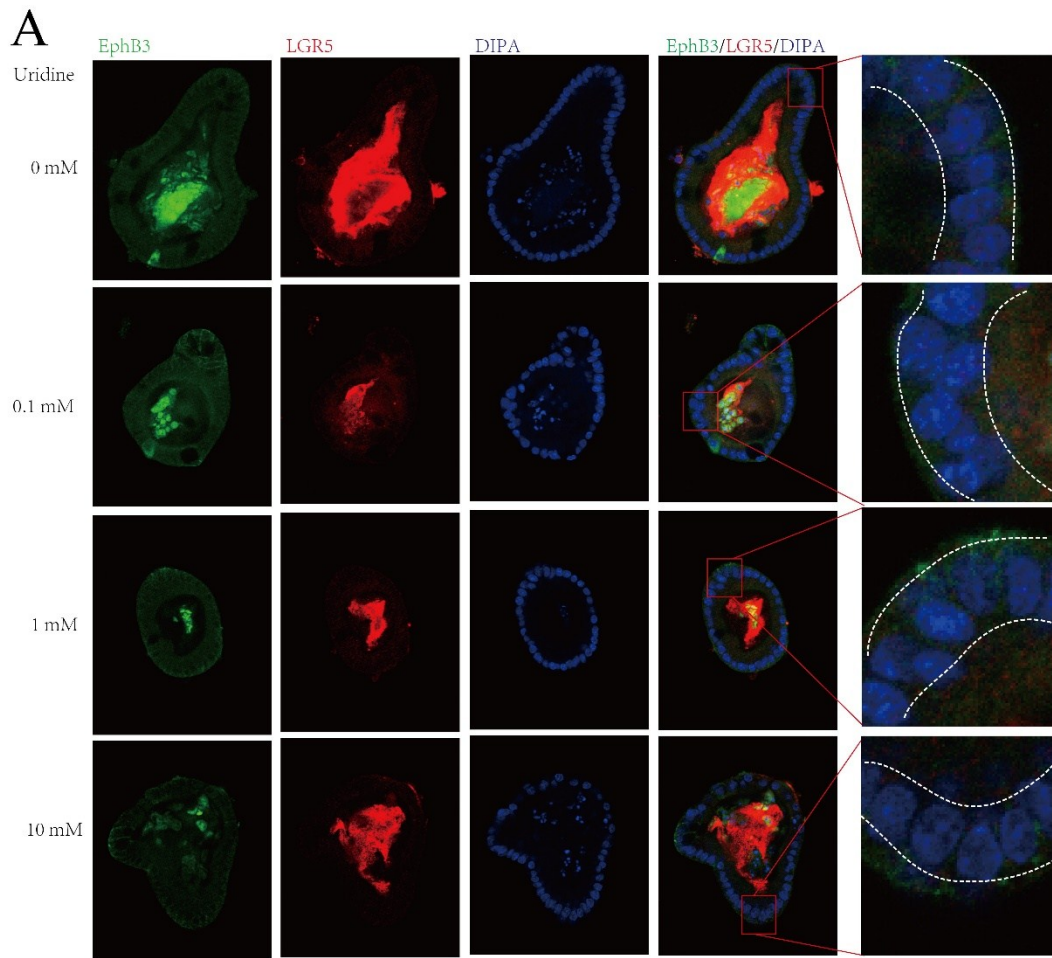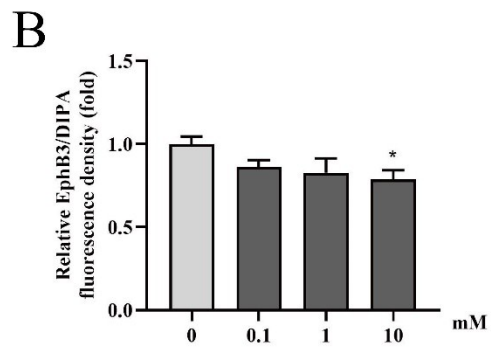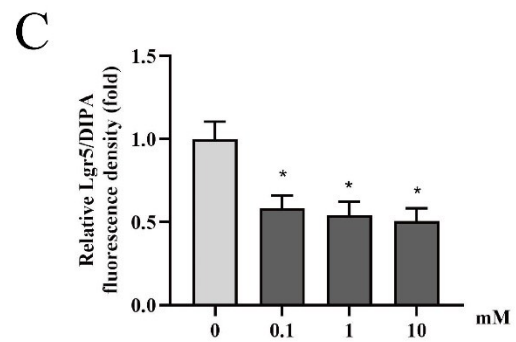

**Supplementary FIGURE 2** Uridine treatment (18h) suppresses the expression of EphB3 and LGR5 in intestinal organoids (n = 4).
